# Supplementary material for: Synchronization of the circadian clock by time-restricted feeding with progressive increasing calorie intake. Resemblances and differences regarding a sustained hypocaloric restriction
Source: PubMed Central journal article supplement (PMC7308331; doi:10.1038/s41598-020-66538-0), 2020-06-22
Supplement: 41598_2020_66538_MOESM1_ESM.pdf [file 41598_2020_66538_MOESM1_ESM.pdf]

**Synchronization of the circadian clock by time restricted feeding with progressive increasing calorie intake. Resemblances and differences regarding a sustained hypocaloric restriction**

Ana Cristina García-Gaytán<sup>1,+</sup>, Manuel Miranda-Anaya<sup>2,+</sup>, Isaías Turrubiate<sup>1,+</sup>, Leonardo López-De Portugal<sup>1</sup>, Guadalupe Nayeli Bocanegra-Botello<sup>1</sup>, Amairani López-Islas<sup>1</sup>, Mauricio Díaz-Muñoz<sup>1</sup>, Isabel Méndez<sup>1,\*</sup>.

<sup>1</sup>Instituto de Neurobiología, Universidad Nacional Autónoma de México (UNAM), Campus UNAM-Juriquilla. Querétaro, 76230, México.

<sup>2</sup>Unidad Multidisciplinaria de Docencia e Investigación, Facultad de Ciencias, Universidad Nacional Autónoma de México (UNAM), Campus UNAM-Juriquilla. Querétaro, 76230, México.

+ contributed equally to this work.

\* corresponding author (isabelcm@unam.mx)

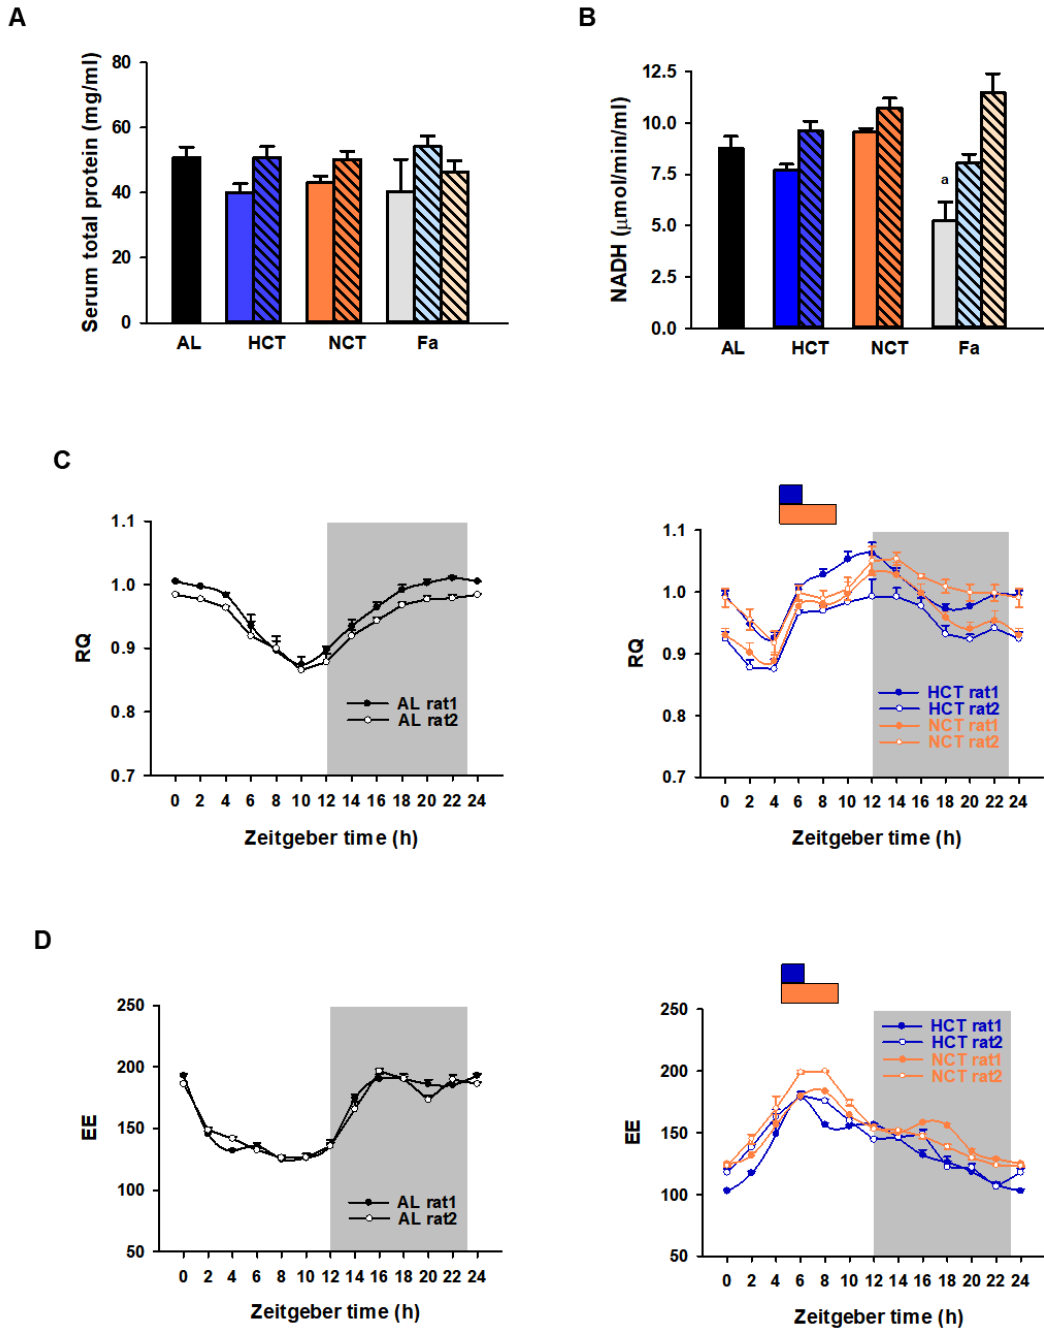

Supplementary Figure 1. Nutritional and metabolic status under AL, HCT, and NCT. (A) Total protein and (B) lactate dehydrogenase in serum as markers of nutritional status were evaluated before (ZT3) and after feeding (ZT6 in HCT, ZT9 in NCT, dashed bars) after 21 days of each time restricted feeding protocol. A single 21 h fasting at ZT3 (Fa, grey) and dashed bars represent refeeding for 2 h (clear blue, ZT6) and 5 h (clear orange, ZT9).  $P < 0.05$  a vs AL. (C) 24 h respiratory quotient (RQ) (ratio  $\text{CO}_2$  produced/ $\text{O}_2$  consumed) in AL (left) and HCT and NCT (right). (D) 24 h energy expenditure (EE) in AL (left) and HCT and NCT (right). Each point represents the average of recording for 3 days.

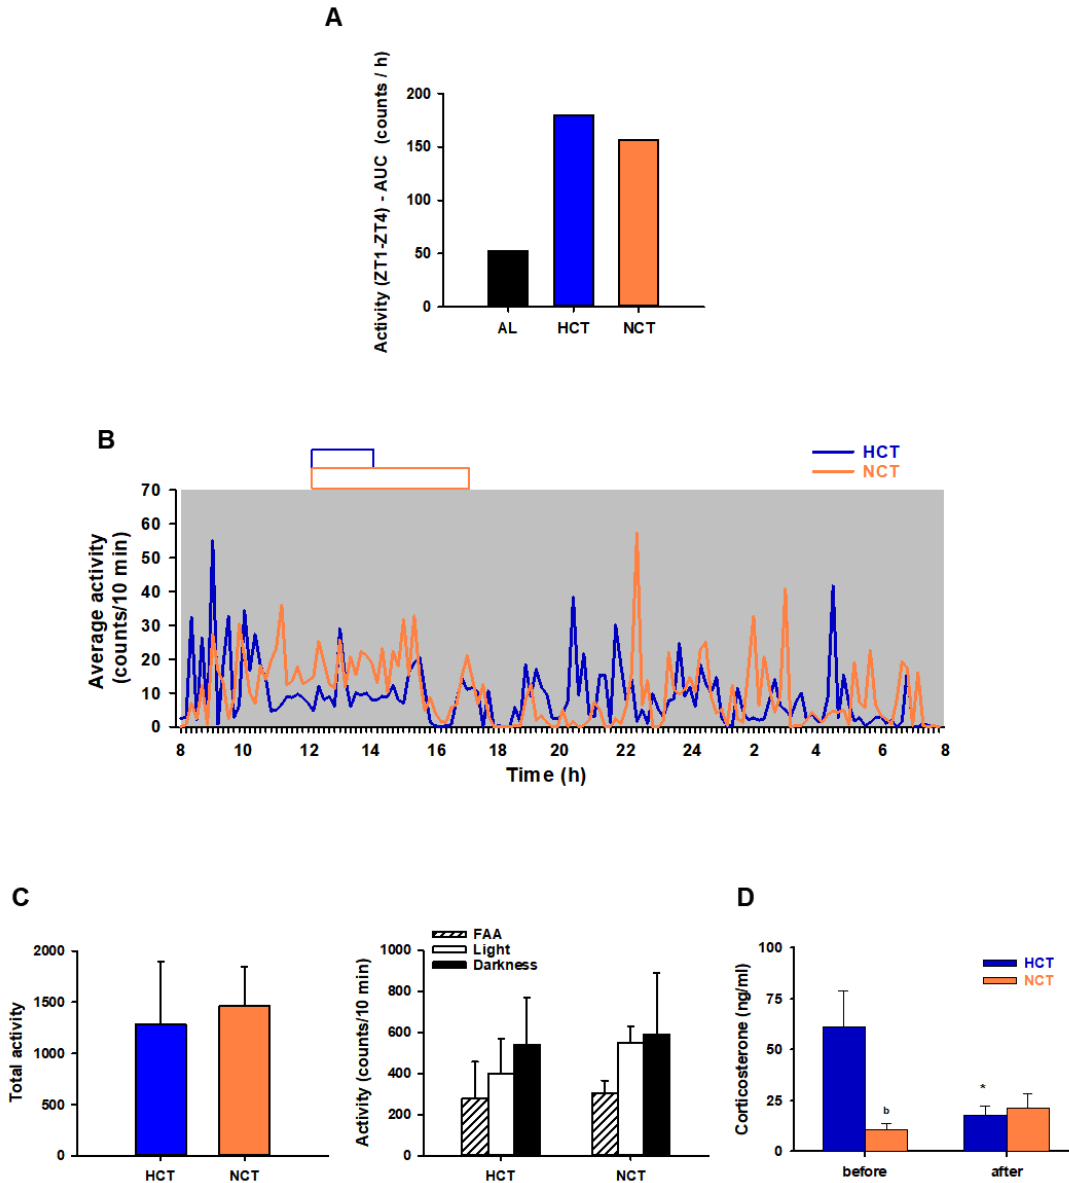

Supplementary Figure 2. Food anticipatory activity and persistence. (A) The area under the curve 3 h before food access (ZT1-ZT4) corresponding to spontaneous basal activity under AL condition and the food-anticipatory activity (FAA) under HCT and NCT in 12:12 h light-dark cycles. (B-C) Locomotor activity in constant conditions: fasting and 12:12 h dark-dark conditions over a 24 h cycle, after 21 days of HCT and NCT. (B) Activity profiles of rats. Waveforms represent the sum into 10-min bins and the average of a one-day recording. Horizontal bars represent the expected time of food access defined in the previous light-dark cycles (blue, HCT; orange, NCT). Each point represents the recording average of 3 rats. (C-left) Average of the total activity in all groups; (C-center) Representation of activity in circadian time during FAA (9:00-12:00 h), the rest of the “light period” (12:00-20:00 h) and “darkness” (20:00-8:00 h). (D) Corticosterone levels measured before and after food access in NCT and HCT (n= 4 rats).  $P < 0.05$  b vs HCT, \* vs before food access in their respective group.

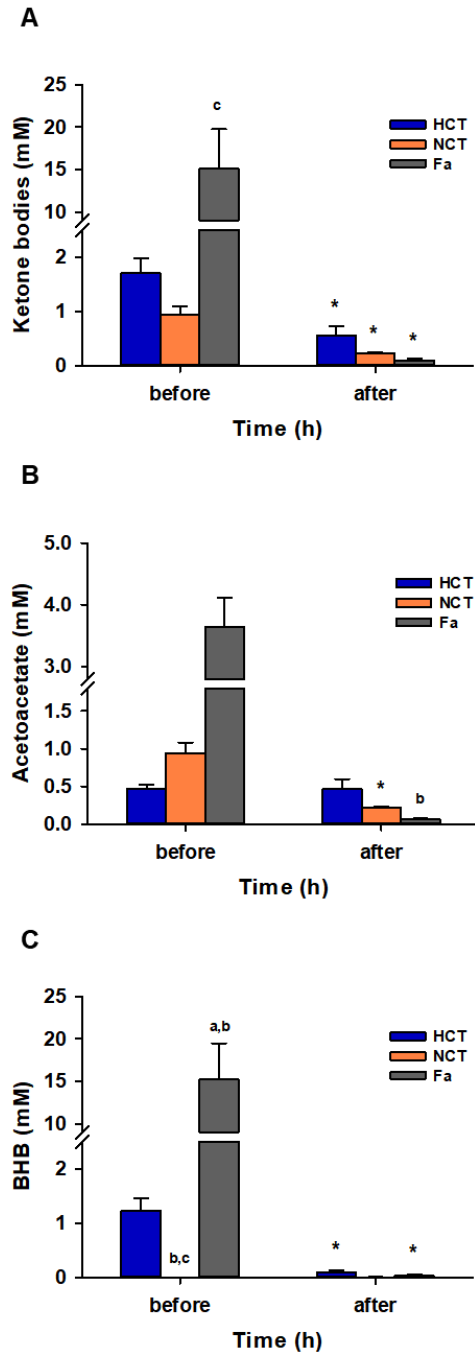

Supplementary Figure 3. Effect of fasting (Fa), refeeding, HCT and NCT (n= 4 rats) on ketone bodies. Serum ketone bodies measured before (ZT3) and after feeding (ZT6 in HCT or Fa, ZT 9 in NCT) after 21 days of each time restricted feeding protocol. A single 21 h fasting at ZT3 (Fa, grey) and dashed bars represent refeeding for 2 h (clear blue, ZT6) and 5 h (clear orange, ZT9). (A) Total ketone bodies, (B) acetoacetate and (C)  $\beta$ -hydroxybutyrate (BHB). Bars represent the mean  $\pm$  SEM.  $P < 0.01$  a vs AL, b vs HCT, c vs NCT.  $P < 0.05$  \* vs before food access in their respective group.

**Supplementary Table S1. Oligonucleotides used as qPCR primers**

| <b>Gene</b>  | <b>Oligonucleotide sense</b> | <b>Oligonucleotide antisense</b> | <b>Amplicon length (bp)</b> | <b>Annealing temperature (°C)</b> | <b>NCBI reference</b> |
|--------------|------------------------------|----------------------------------|-----------------------------|-----------------------------------|-----------------------|
| <b>Arntl</b> | CTGCCTCGTTGCAATCGGGC         | GCCAAAATAGCCGTCGCCCTCT           | 149                         | 65                                | NM_024362.2           |
| <b>Per1</b>  | AGCCCCGGAGTCGGACATC          | GGGACAGCACGGCCTTGTC              | 149                         | 68                                | NM_001034125.1        |
| <b>Nr1d1</b> | CTTCCGTGACCTTTCTCAGC         | CTGGTCCTTCACGTTGAACA             | 82                          | 63.7                              | NM_145775.2           |
| <b>G6pc</b>  | GATCGCTGACCTCAGGAACGC        | AGAGGCACGGAGCTGTTGCTG            | 197                         | 70                                | NM_176077.3           |
| <b>Pck1</b>  | ACGGTGGGAACACTACTGCTTG       | TGCCTTCGGGGTTAGTTATGC            | 122                         | 64.5                              | NM_198780.3           |
| <b>Fgf21</b> | CAGGGGTCATTCAAATCCTG         | CAAAGTGAGGCGATCCATAG             | 87                          | 59                                | NM_130752.1           |
| <b>Rps18</b> | TTCAGCACATCCTGCGAGTA         | GCAGACATTGACCTCACCAA             | 115                         | 62                                | NM_213557.1           |

**Supplementary Table S2. Feeding parameters according to Hanes-Woolf analysis**

| <b>Group</b> | <b>Food intake<sub>max</sub>/2<br/>(days)</b> | <b>Food intake<sub>max</sub><br/>(kcal)</b> | <b>Food intake<sub>max</sub><br/>(%)</b> |
|--------------|-----------------------------------------------|---------------------------------------------|------------------------------------------|
| <b>AL</b>    | <b>0.25</b>                                   | <b>127.4</b>                                | <b>100</b>                               |
| <b>HCT</b>   | <b>2.78</b>                                   | <b>76.8</b>                                 | <b>60</b>                                |
| <b>NCT</b>   | <b>2.65</b>                                   | <b>118.6</b>                                | <b>93</b>                                |

**Supplementary Table S3. Values for two-way ANOVA for several temporal parameters measured during restricted feeding protocols (food intake and body mass and glucose) or at the end of the protocols (day 21); ns, non significant.**

| Parameter                      | Feeding condition       |                  | Time                   |                  | Interaction            |                  |
|--------------------------------|-------------------------|------------------|------------------------|------------------|------------------------|------------------|
|                                | <i>F</i>                | <i>P</i>         | <i>F</i>               | <i>P</i>         | <i>F</i>               | <i>P</i>         |
| <b>Food intake</b>             | $F_{(2,117)} = 249.541$ | <b>&lt;0.001</b> | $F_{(7,117)} = 8.847$  | <b>&lt;0.001</b> | $F_{(14,117)} = 1.236$ | ns               |
| <b>Body mass</b>               | $F_{(2,30)} = 33.793$   | <b>&lt;0.001</b> | $F_{(4,30)} = 40.599$  | <b>&lt;0.001</b> | $F_{(8,30)} = 6.982$   | <b>&lt;0.001</b> |
| <b>Arntl mRNA</b>              | $F_{(2,72)} = 9.35$     | <b>&lt;0.001</b> | $F_{(7,72)} = 2.214$   | <b>&lt;0.05</b>  | $F_{(14,72)} = 2.214$  | <b>&lt;0.001</b> |
| <b>Per1 mRNA</b>               | $F_{(2,72)} = 1.982$    | ns               | $F_{(7,72)} = 9.721$   | <b>&lt;0.001</b> | $F_{(14,72)} = 6.848$  | <b>&lt;0.001</b> |
| <b>Nrd1 mRNA</b>               | $F_{(2,72)} = 5.253$    | <b>&lt;0.001</b> | $F_{(7,72)} = 4.268$   | <b>&lt;0.05</b>  | $F_{(14,72)} = 7.773$  | <b>&lt;0.001</b> |
| <b>G6pc mRNA</b>               | $F_{(2,72)} = 6.094$    | <b>&lt;0.01</b>  | $F_{(7,72)} = 4.013$   | <b>&lt;0.001</b> | $F_{(14,72)} = 9.805$  | <b>&lt;0.001</b> |
| <b>Pck1 mRNA</b>               | $F_{(2,71)} = 0.819$    | ns               | $F_{(7,71)} = 1.604$   | ns               | $F_{(14,71)} = 7.658$  | <b>&lt;0.001</b> |
| <b>Fgf21 mRNA</b>              | $F_{(2,71)} = 0.126$    | ns               | $F_{(7,71)} = 1.309$   | ns               | $F_{(14,71)} = 7.27$   | <b>&lt;0.001</b> |
| <b>Glucose (week 1)</b>        | $F_{(1,48)} = 4.108$    | <b>&lt;0.05</b>  | $F_{(7,48)} = 5.09$    | <b>&lt;0.001</b> | $F_{(7,48)} = 0.876$   | ns               |
| <b>Glucose (week 2)</b>        | $F_{(1,48)} = 0.163$    | ns               | $F_{(7,48)} = 2.705$   | <b>&lt;0.05</b>  | $F_{(7,48)} = 0.603$   | ns               |
| <b>Glucose (week 3)</b>        | $F_{(2,96)} = 0.00405$  | ns               | $F_{(7,96)} = 2.511$   | <b>&lt;0.05</b>  | $F_{(14,96)} = 1.695$  | ns               |
| <b>GTT</b>                     | $F_{(2,48)} = 6.305$    | <b>&lt;0.01</b>  | $F_{(5,48)} = 60.783$  | <b>&lt;0.001</b> | $F_{(10,48)} = 2.129$  | <b>&lt;0.05</b>  |
| <b>Total ketone bodies</b>     | $F_{(1,47)} = 121.534$  | <b>&lt;0.001</b> | $F_{(7,47)} = 12.432$  | <b>&lt;0.001</b> | $F_{(7,47)} = 9.308$   | <b>&lt;0.001</b> |
| <b>Acetoacetate</b>            | $F_{(1,44)} = 27.902$   | <b>&lt;0.001</b> | $F_{(7,44)} = 3.185$   | <b>&lt;0.01</b>  | $F_{(7,44)} = 5.75$    | <b>&lt;0.001</b> |
| <b>Beta-hydroxybutyrate</b>    | $F_{(1,47)} = 55.815$   | <b>&lt;0.001</b> | $F_{(7,47)} = 5.944$   | <b>&lt;0.001</b> | $F_{(7,47)} = 6.524$   | <b>&lt;0.001</b> |
| <b>Conjugated dienes</b>       | $F_{(2,72)} = 22.575$   | <b>&lt;0.001</b> | $F_{(7,72)} = 146.946$ | <b>&lt;0.001</b> | $F_{(14,72)} = 18.641$ | <b>&lt;0.001</b> |
| <b>TBARS</b>                   | $F_{(2,67)} = 31.404$   | <b>&lt;0.001</b> | $F_{(7,67)} = 10.361$  | <b>&lt;0.001</b> | $F_{(14,67)} = 9.863$  | <b>&lt;0.001</b> |
| <b>TBARS + Fe<sup>2+</sup></b> | $F_{(2,68)} = 52.809$   | <b>&lt;0.001</b> | $F_{(7,68)} = 6.319$   | <b>&lt;0.001</b> | $F_{(14,68)} = 2.933$  | <b>0.002</b>     |

**Supplementary Table S4. Values for Student's t-test for several parameters measured at the end (day 21) of the respective restricted feeding protocol; ns, non significant**

| Parameter                       | Feeding condition |          |
|---------------------------------|-------------------|----------|
|                                 | <i>t</i>          | <i>P</i> |
| Acetoacetate                    | 2.22              | ns       |
| Beta-hydroxybutyrate            | 3.019             | <0.01    |
| Stomach weight                  | 8.791             | <0.01    |
| Insulin                         | 4.037             | <0.01    |
| Perirenal adipose tissue weight | 26.822            | <0.001   |
| Corticosterone                  | -3.399            | <0.05    |
